# Supplementary material for: Omentin as a novel biomarker of metabolic risk factors
Source: Springer Nature journal article supplement (doi:10.1186/1758-5996-4-37), 2012-07-26

A

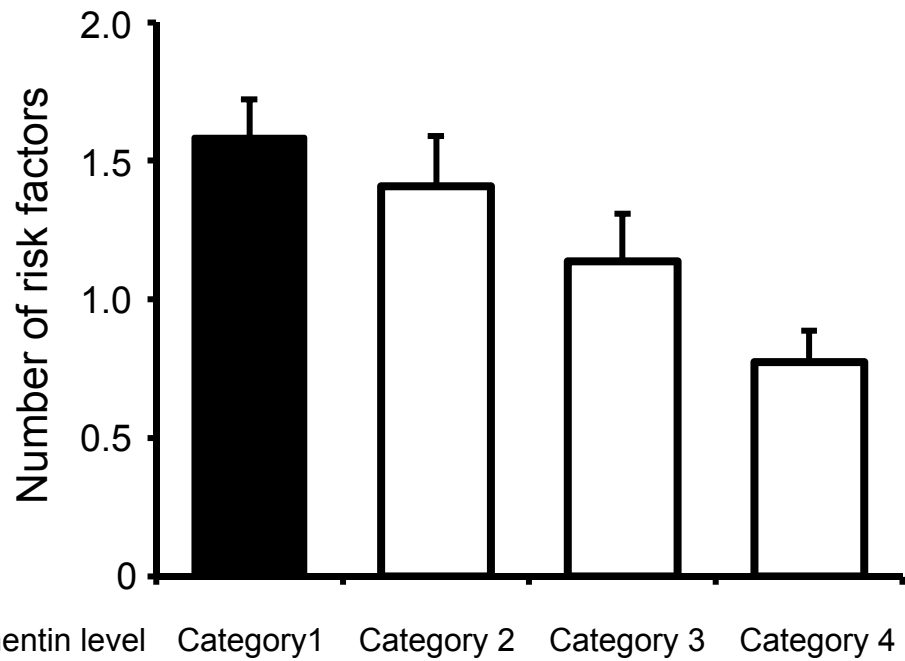

B

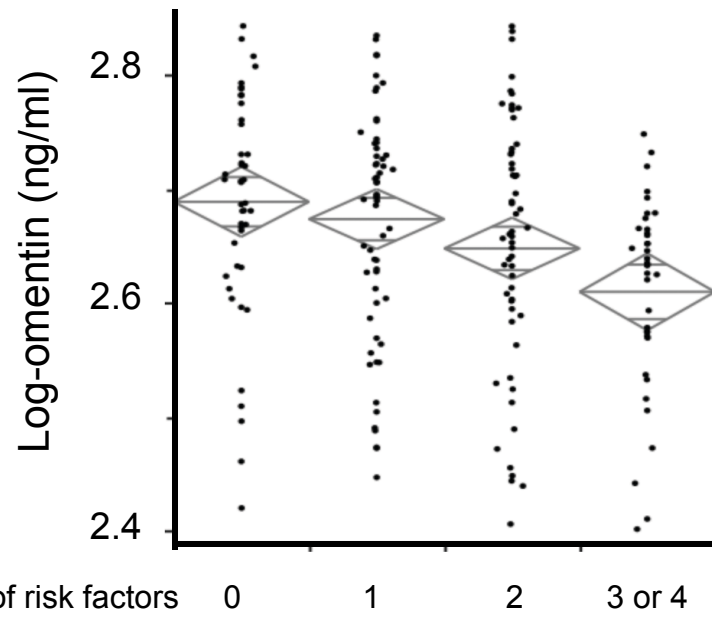

Supplement: 13098_2012_159_MOESM1_ESM.pdf [file 13098_2012_159_MOESM1_ESM.pdf]
